# Supplementary material
Source: Springer Nature journal article supplement (https://www.springermedizin.de/resource/supplementary/13058_2012_3026_MOESM3_ESM.pdf/9703110)

**A****SUM102**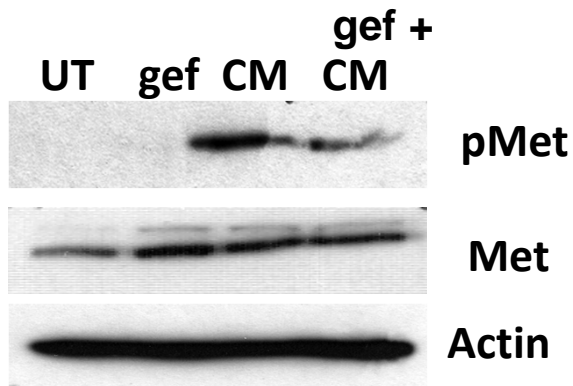**SUM149**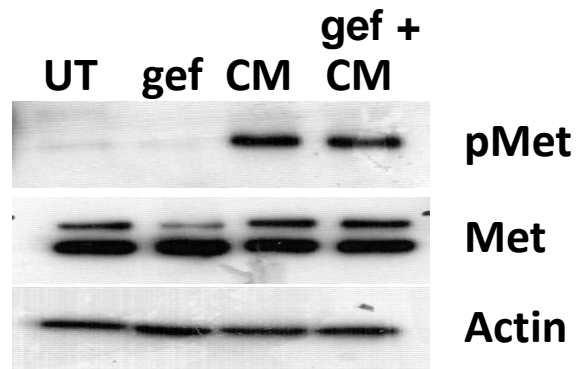**B**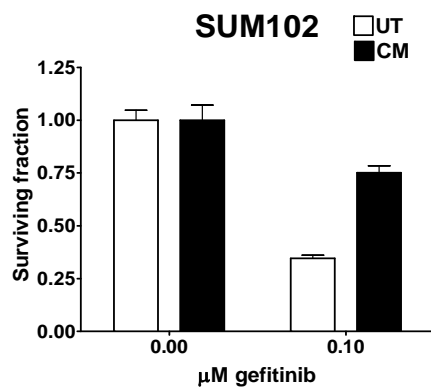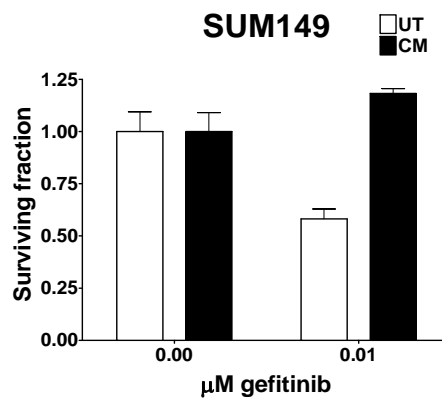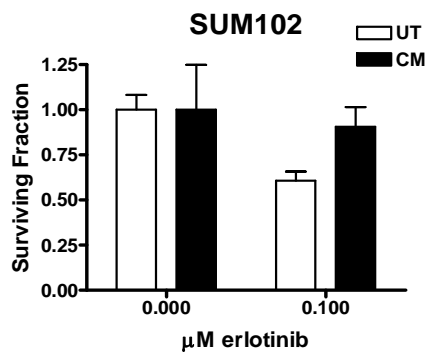

Supplement: MOESM3 [file 9703110]
